# Supplementary material for: A Hybrid Epithelial to Mesenchymal Transition in Ex Vivo Cutaneous Squamous Cell Carcinoma Tissues
Source: MDPI journal article supplement (doi:10.3390/ijms23169183), 2022-08-16
Supplement: s1 [file s1]

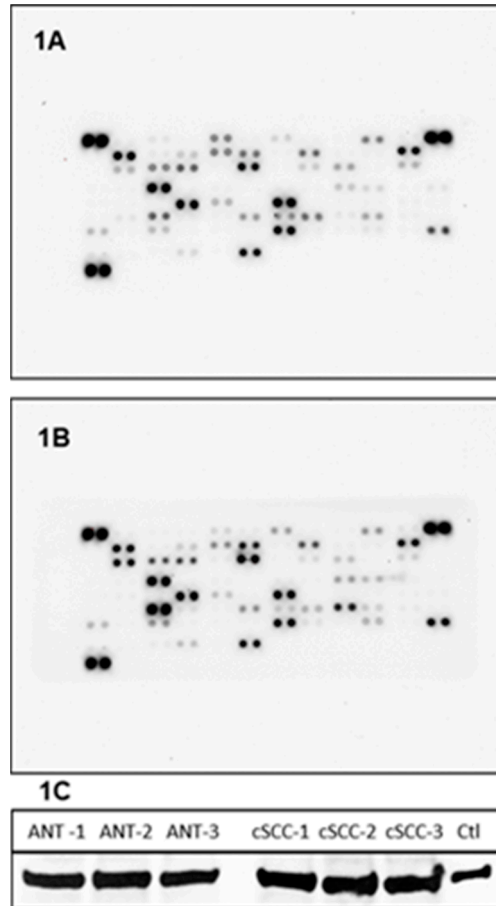

**Figure S1.** Representative dot blots showing expression of 84 oncogenic proteins from ANT and cSCC tissues.

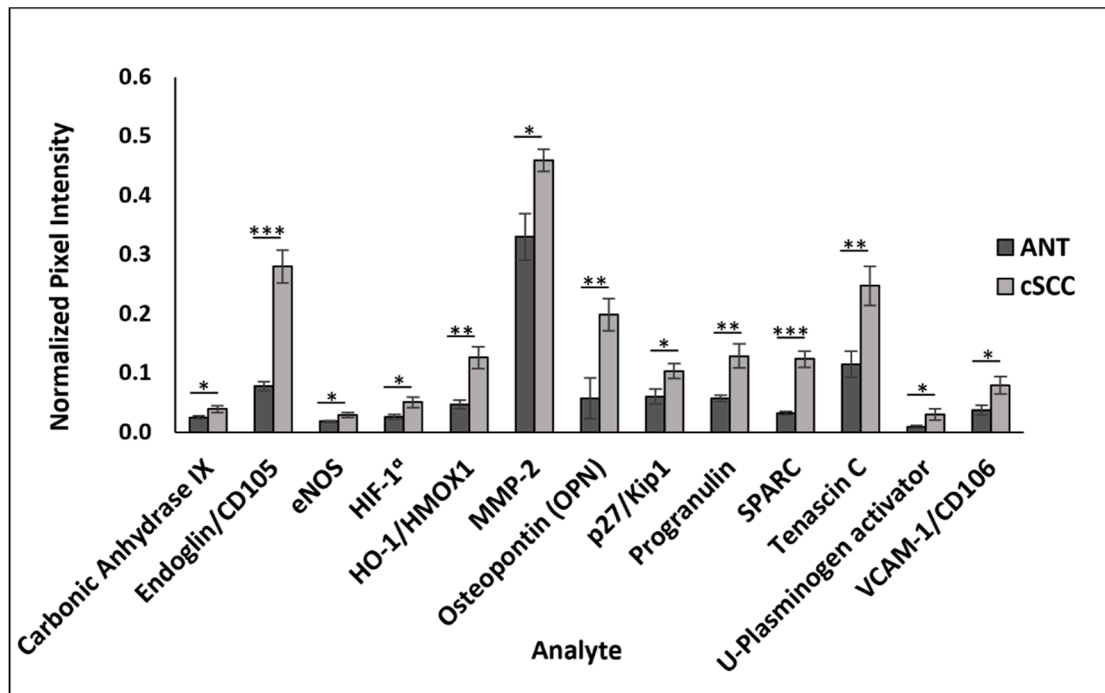

**Figure S2.** Protein expression using a Proteome Profiler Oncogenic Array.

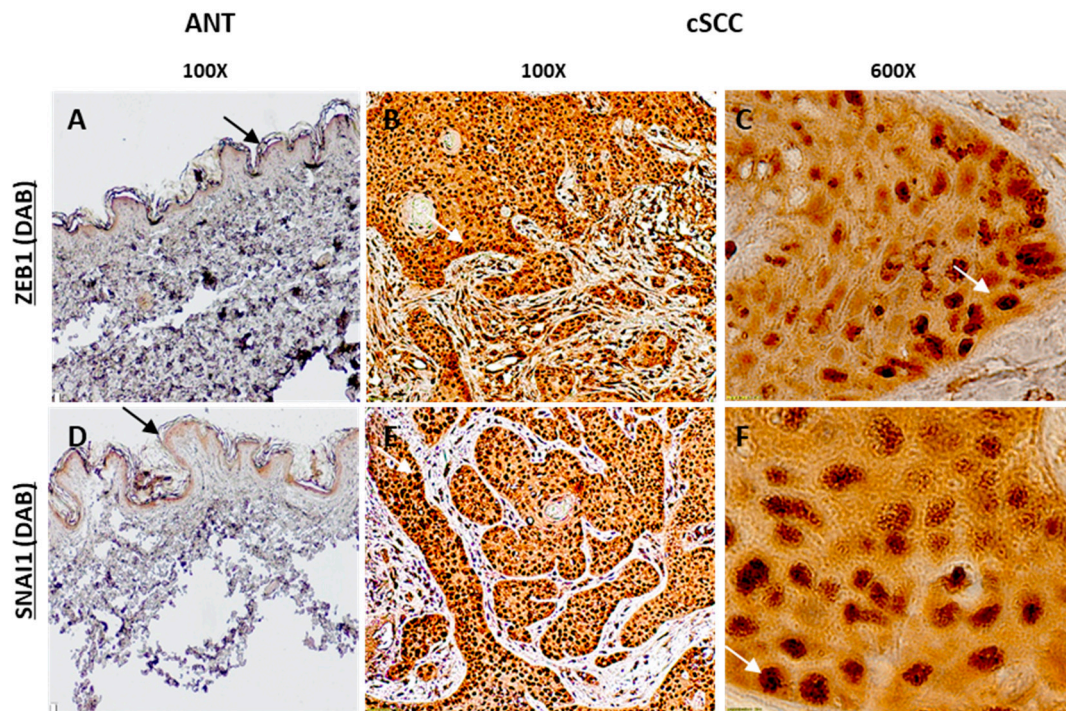

**Figure S3.** Immunohistochemistry of normal (ANT) and cancer (cSCC) tissues for ZEB1 and SNAIL.

**Table S1.** Demographics of patient-derived samples obtained from ALBR®.

| Group | N  | Diagnosis                          | Sex                    | Median Age | Location                |                     |                  |
|-------|----|------------------------------------|------------------------|------------|-------------------------|---------------------|------------------|
| cSCC  | 74 | SCCis (46); SCC (6); Invasive (22) | Male (43); Female (31) | 69         | Face, Scalp & Neck (51) | Trunk&Shoulder (10) | Extremities (13) |
| ANT   | 71 | SCCis (44); SCC (5); Invasive (22) | Male (40); Female (31) | 69         | Face, Scalp & Neck (42) | Trunk&Shoulder (11) | Extremities (18) |
